# Supplementary material for: Hydrothermal synthesis and characterization of a series of luminescent Zn(ii) and Cd(ii) coordination polymers with the new versatile multidentate ligand 1,3-di-(1,2,4-triazol-4-yl)benzene
Source: Royal Society of Chemistry journal article supplement (doi:10.1039/c3ce40946e), 2013-01-01
Supplement: c3ce40946e.pdf [file c3ce40946e.pdf]

## Supporting information

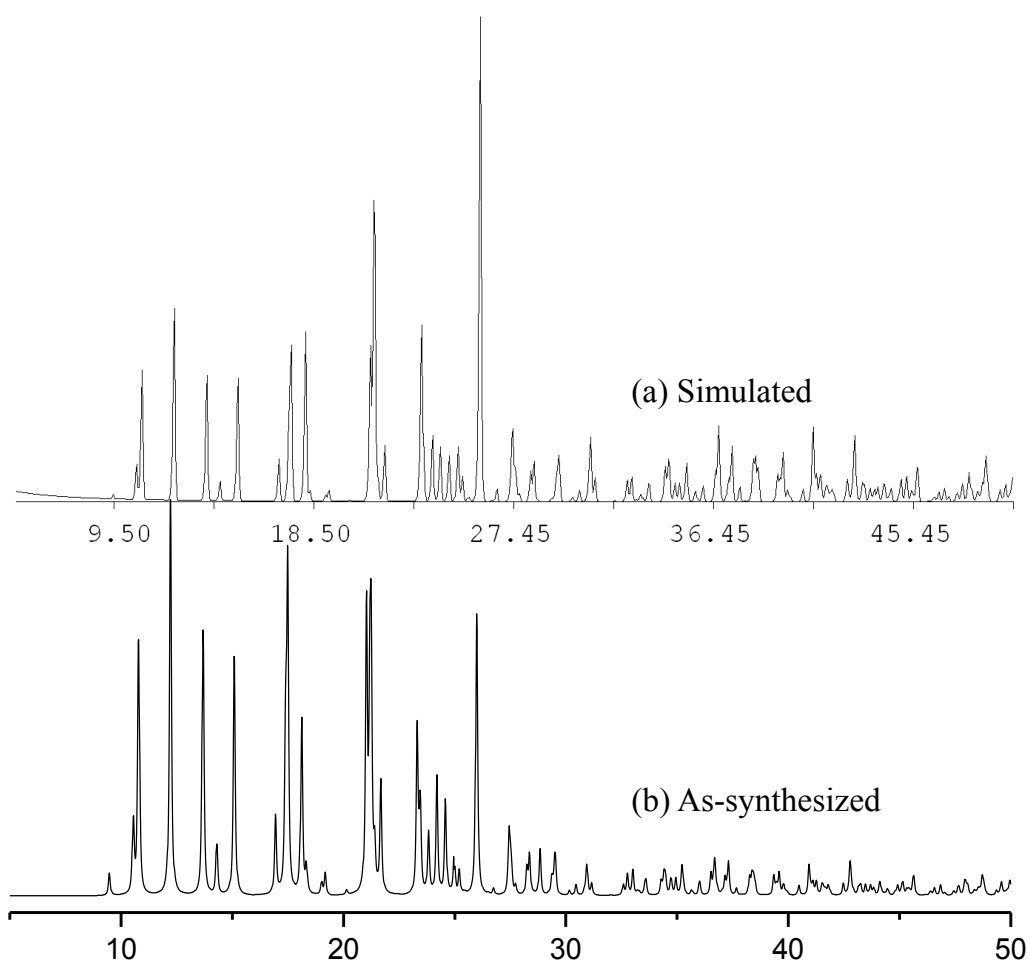

**Fig. S1** X-Ray powder patterns for **2**: (a) calculated on the basis of the structure determined by single-crystal X-ray diffraction. (b) X-ray diffractograms of an original sample of **2**.

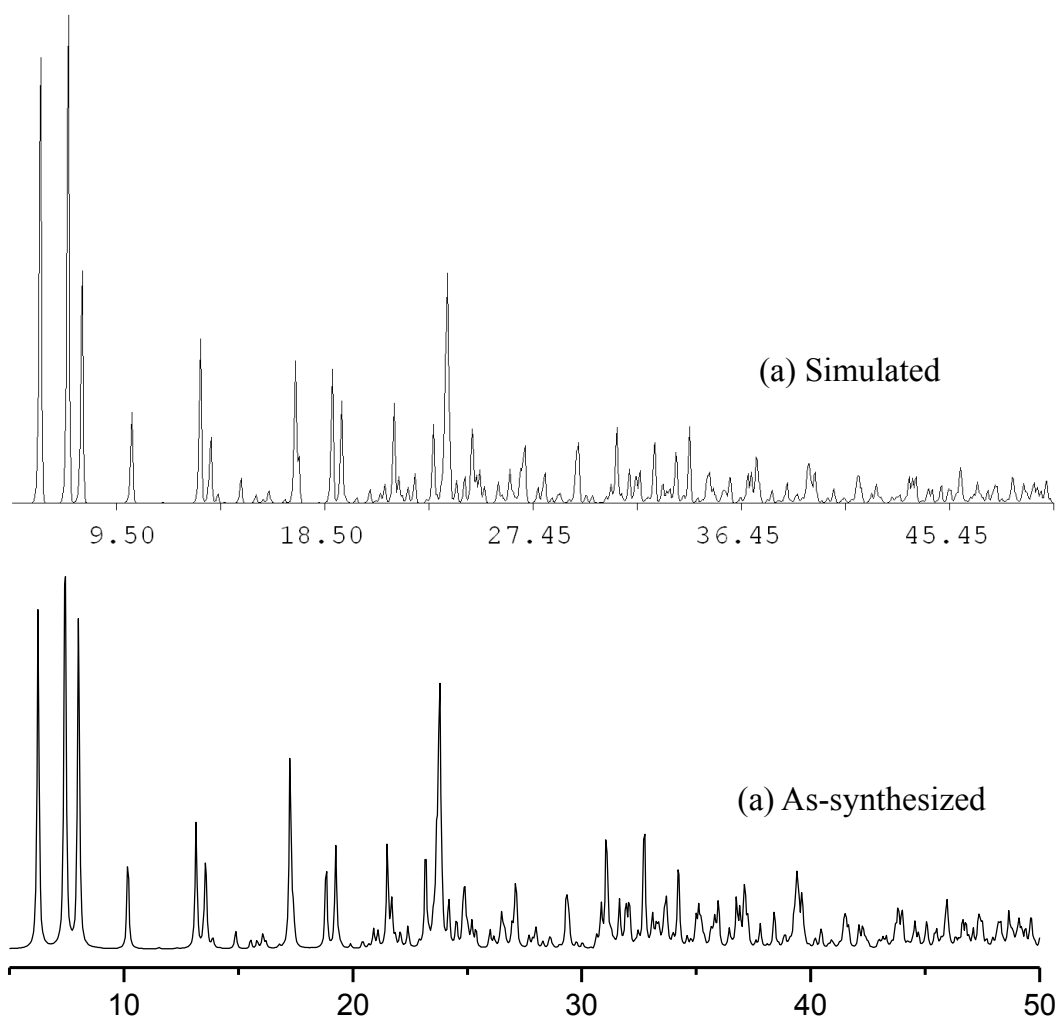

**Fig. S2** X-Ray powder patterns for **3**: (a) calculated on the basis of the structure determined by single-crystal X-ray diffraction. (b) X-ray diffractograms of an original sample of **3**.

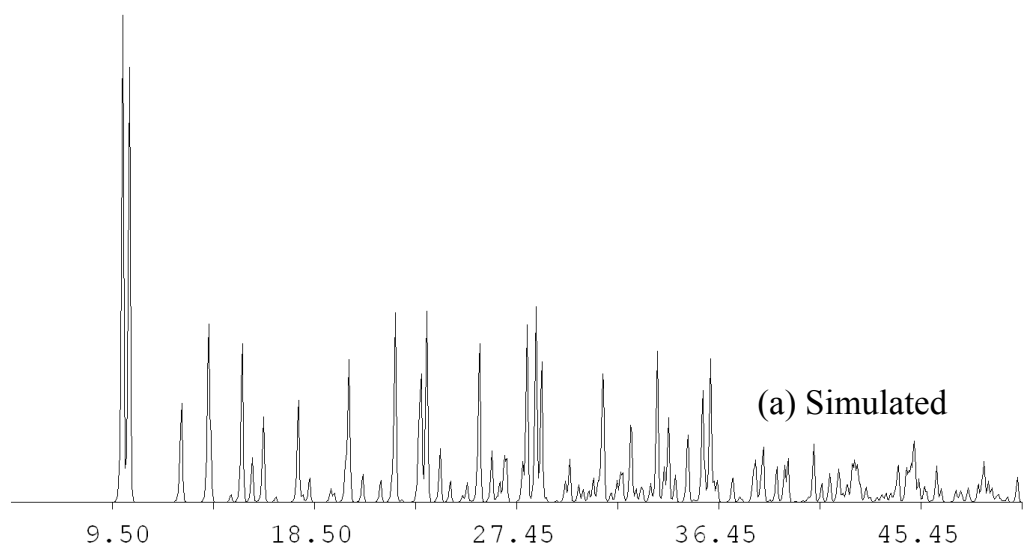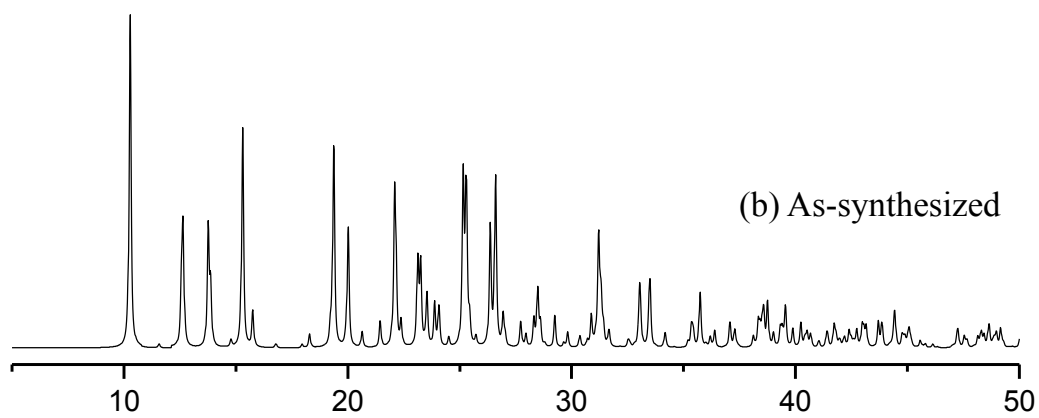

**Fig. S3** X-Ray powder patterns for **4**: (a) calculated on the basis of the structure determined by single-crystal X-ray diffraction. (b) X-ray diffractograms of an original sample of **4**.

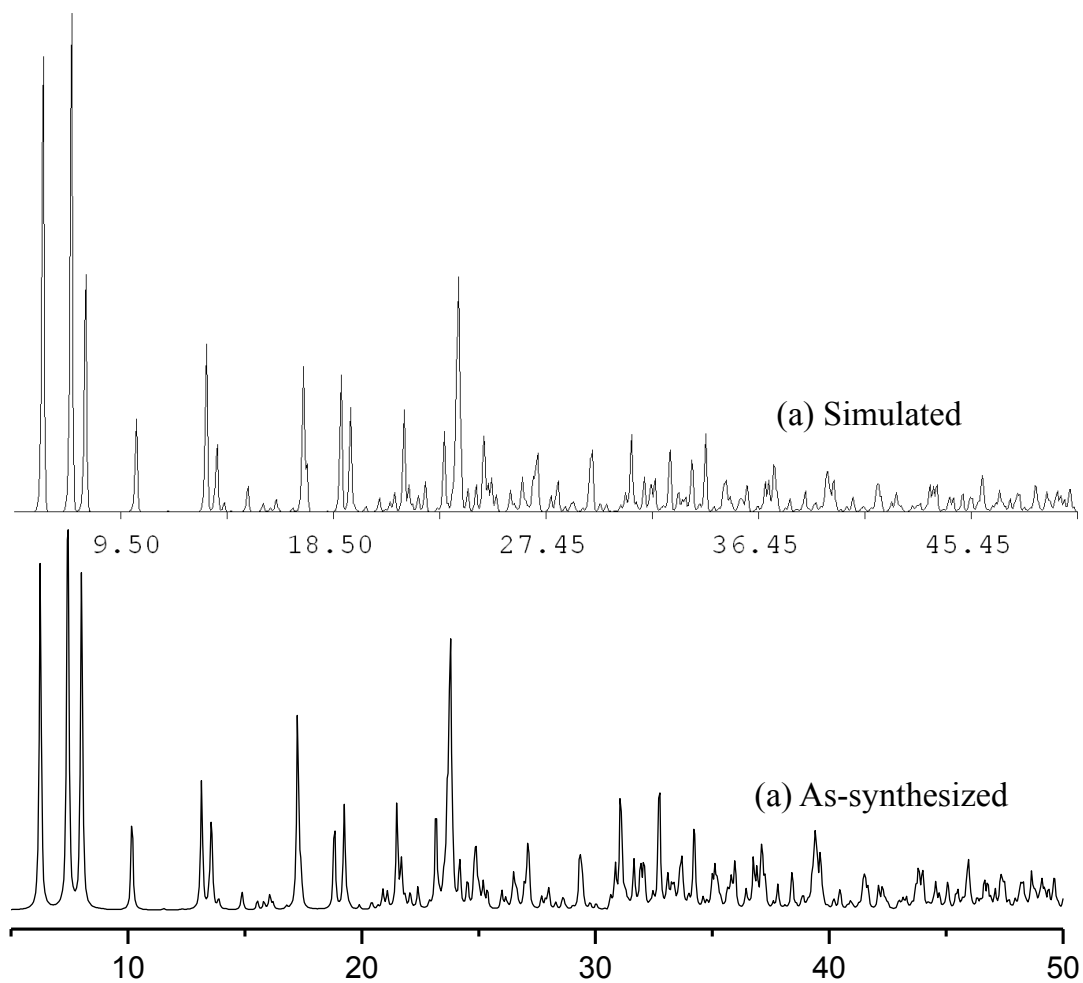

**Fig. S4** X-Ray powder patterns for **5**: (a) calculated on the basis of the structure determined by single-crystal X-ray diffraction. (b) X-ray diffractograms of an original sample of **5**.

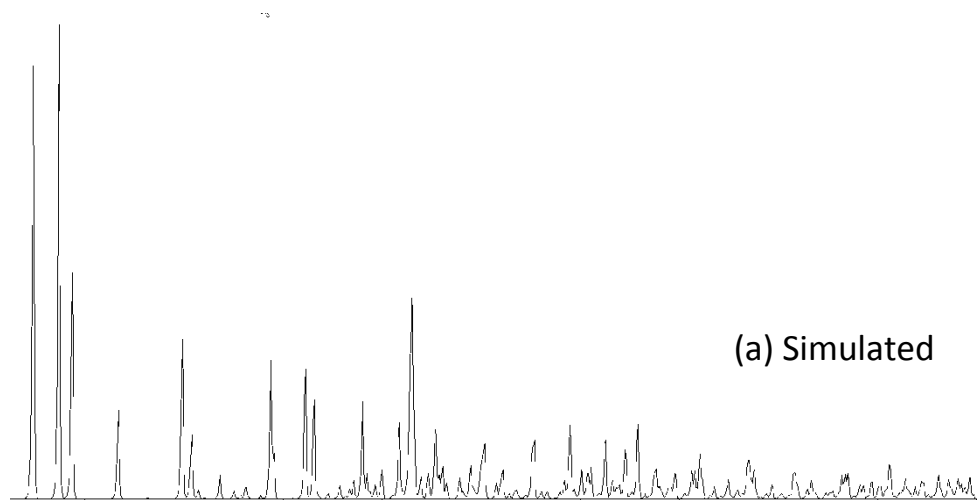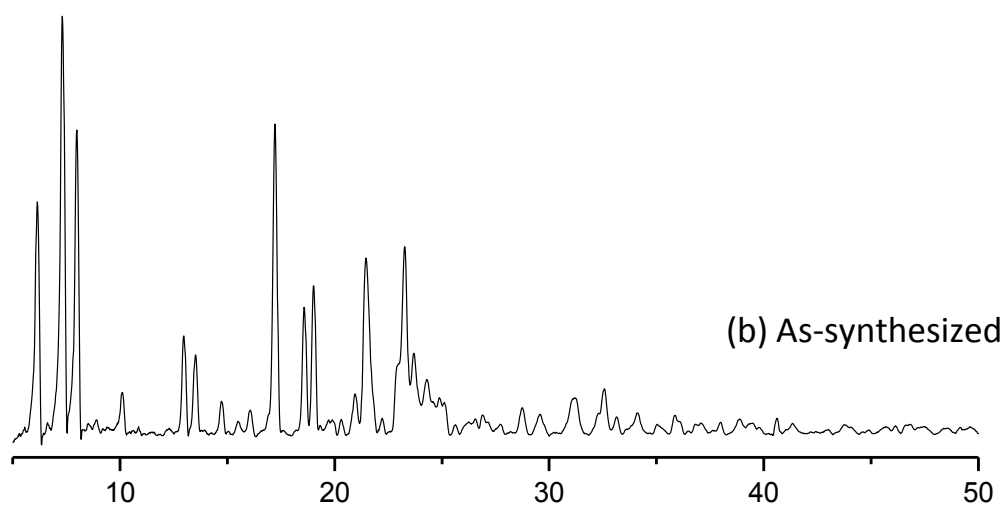

**Fig. S5** X-Ray powder patterns for **6**: (a) calculated on the basis of the structure determined by single-crystal X-ray diffraction. (b) X-ray diffractograms of an original sample of **6**.

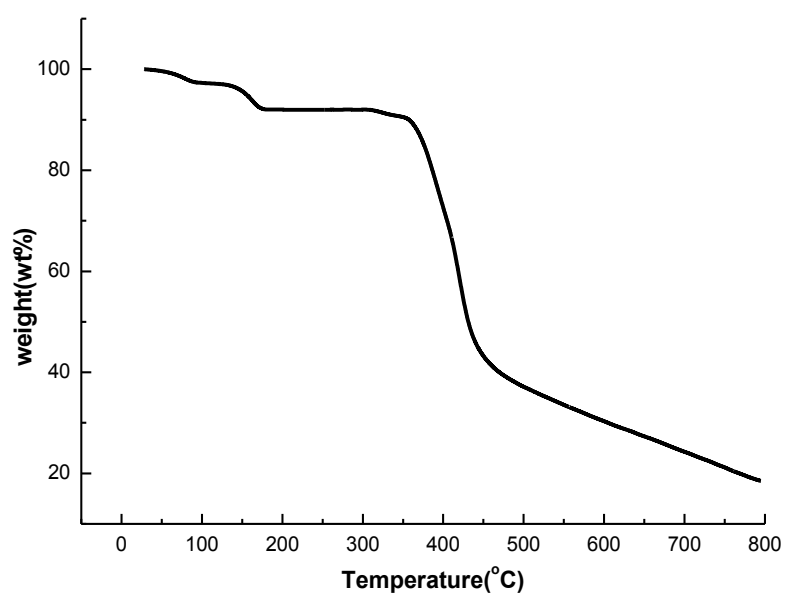

Figure S6 TGA curve of **1**.

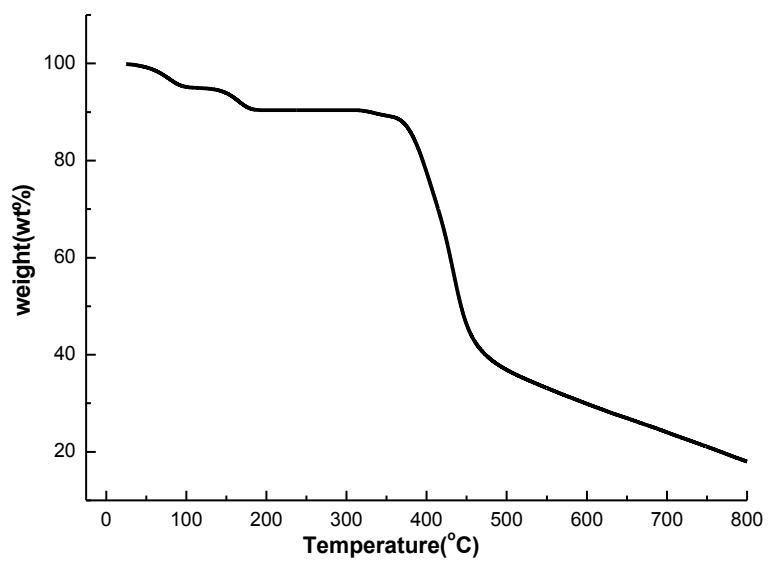

Figure S7 TGA curve of **2**.



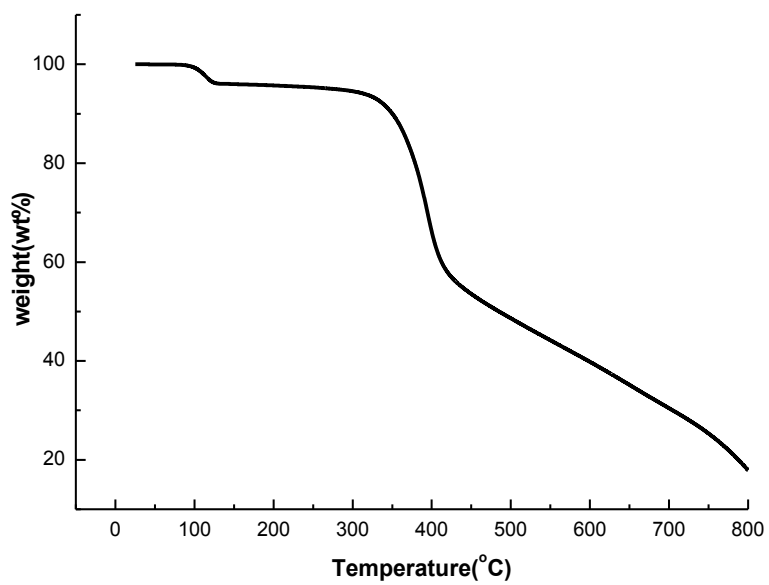

Figure S8 TGA curve of **3**.

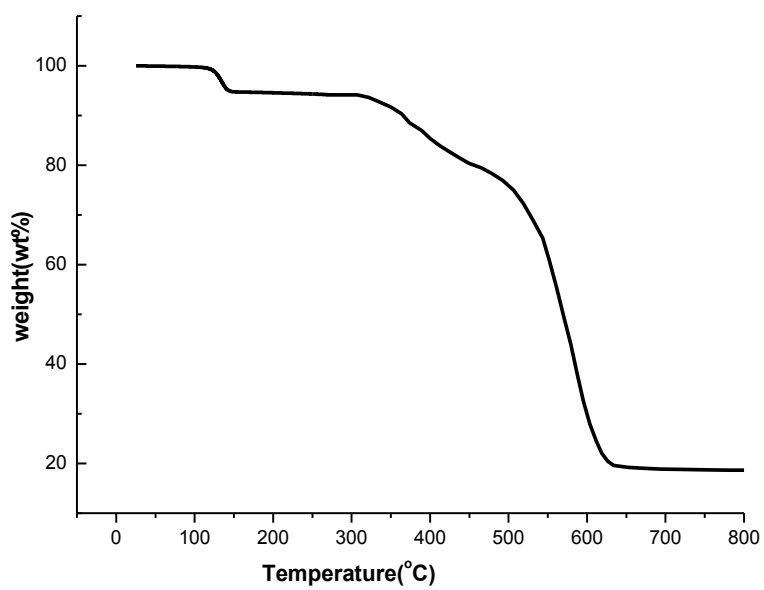

Figure S9 TGA curve of **4**.

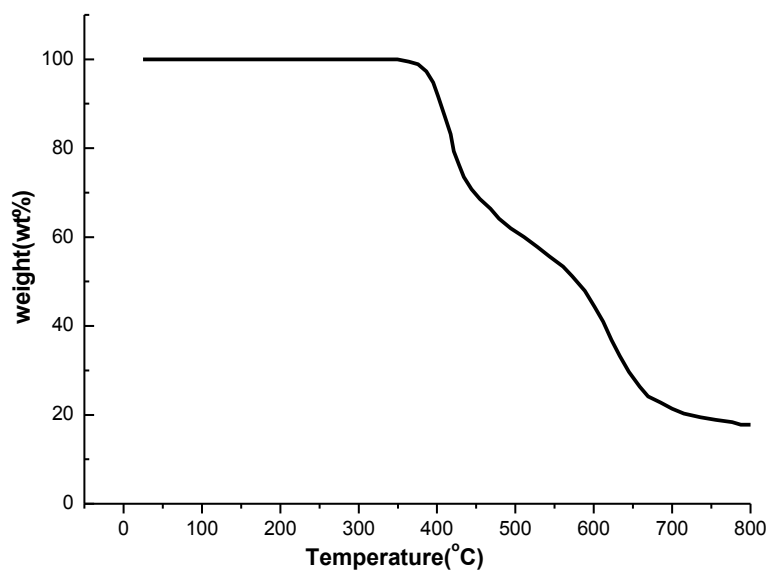

Figure S10 TGA curve of **5**.

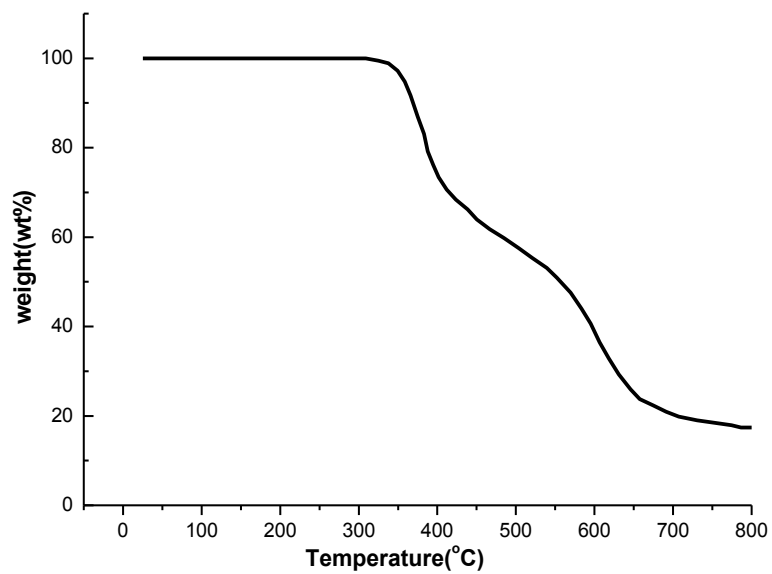

Figure S11 TGA curve of **6**.

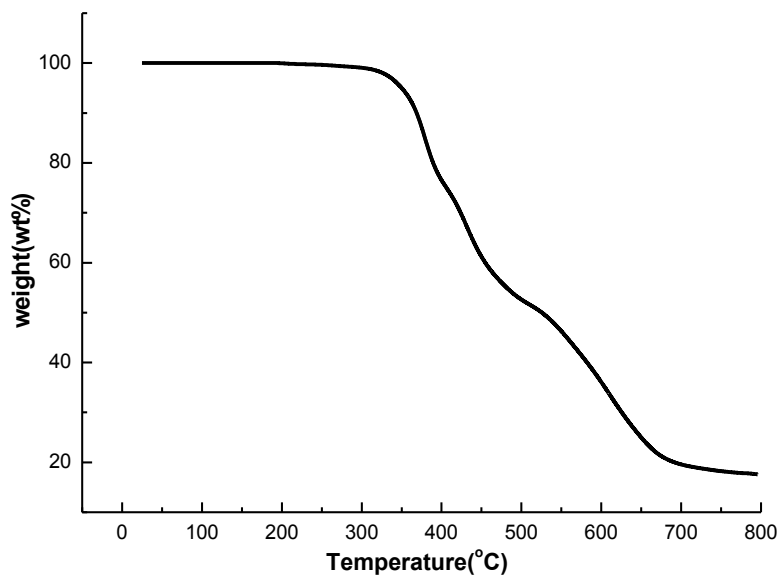

Figure S12 TGA curve of **7**.
